# Supplementary material for: Dry and warm conditions in Australia exacerbated by aerosol reduction in China
Source: Copernicus journal article supplement (doi:10.5194/egusphere-2024-3399), 2024-11-18
Supplement: Supplementary file 1 [file egusphere-2024-3399-supplement.pdf]

## SUPPLEMENTARY INFORMATION

# **Dry and warm conditions in Australia exacerbated by aerosol reduction in China**

Jiyuan Gao<sup>1</sup>, Yang Yang<sup>1\*</sup>, Hailong Wang<sup>2</sup>, Pinya Wang<sup>1</sup>, Hong Liao<sup>1</sup>

<sup>1</sup>Joint International Research Laboratory of Climate and Environment Change (ILCEC), Jiangsu  
Key Laboratory of Atmospheric Environment Monitoring and Pollution Control, Jiangsu  
Collaborative Innovation Center of Atmospheric Environment and Equipment Technology,  
School of Environmental Science and Engineering, Nanjing University of Information Science  
and Technology, Nanjing, Jiangsu, China

<sup>2</sup>Atmospheric, Climate, and Earth Sciences Division, Pacific Northwest National Laboratory,  
Richland, Washington, USA

\*Correspondence to yang.yang@nuist.edu.cn

### **Contents of this file**

Supplementary Figures S1–S29

Supplementary Table S1

27 **Table S1: Experimental design.**

| Experiments | Anthropogenic Emissions of Aerosols and Precursors |                                                |
|-------------|----------------------------------------------------|------------------------------------------------|
|             | China                                              | Other regions of the world                     |
| BASE        | 2013                                               | 2013                                           |
| CHN         | 2019                                               | 2013                                           |
| OTH         | 2013                                               | 2019                                           |
| NAEU        | 2013                                               | North America and Europe: 2019;<br>Other: 2013 |

28

29

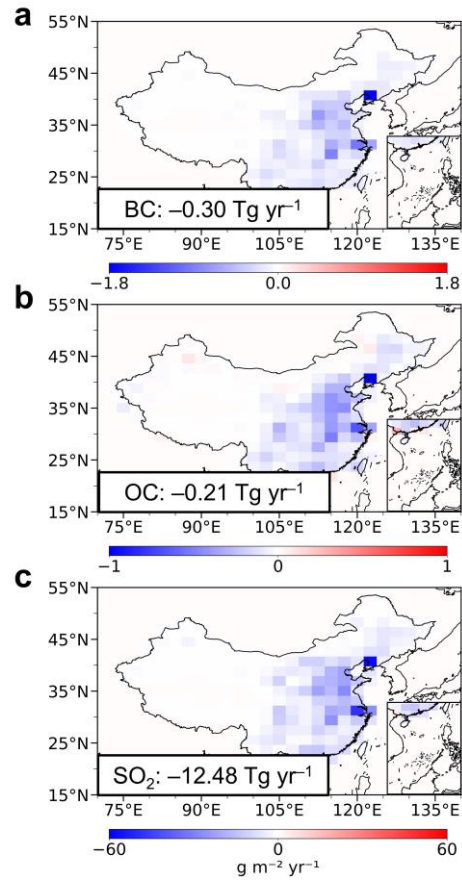

30

31 **Figure S1. Differences in anthropogenic emissions of aerosols and precursors between 2013**  
 32 **and 2019.** Spatial distributions of differences in anthropogenic emissions (unit:  $\text{g m}^{-2} \text{yr}^{-1}$ ) of  
 33 aerosols and precursors, including black carbon (BC, **a**), organic carbon (OC, **b**) and sulfur dioxide  
 34 ( $\text{SO}_2$ , **c**) between 2013 and 2019 (2019 minus 2013). The total changes in China are noted at the  
 35 bottom-left corner of each panel.

36

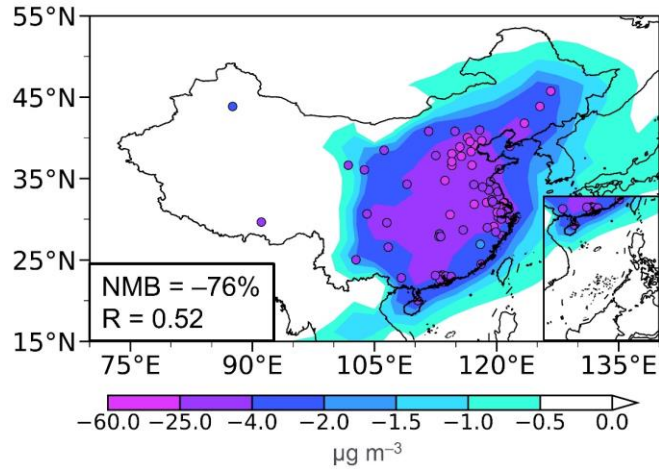

37

38 **Figure S2. Comparisons of temporal changes in near-surface PM<sub>2.5</sub> concentrations between**  
 39 **observation and model simulation.** Spatial distributions of observed (circles) and modeled  
 40 (shades) annual mean changes (2017–2019 minus 2013–2015) in near-surface PM<sub>2.5</sub> concentration  
 41 (unit: µg m<sup>-3</sup>). Normalized mean bias (NMB) and correlation coefficient (R) between observation  
 42 and simulation are shown at the bottom-left corner of each panel.  $NMB = 100 \% \times \sum (Model_i -$   
 43  $Observation_i) / \sum Observation_i$ , where  $Model_i$  and  $Observation_i$  are the modeled and observed  
 44 values at site  $i$ , respectively.

45

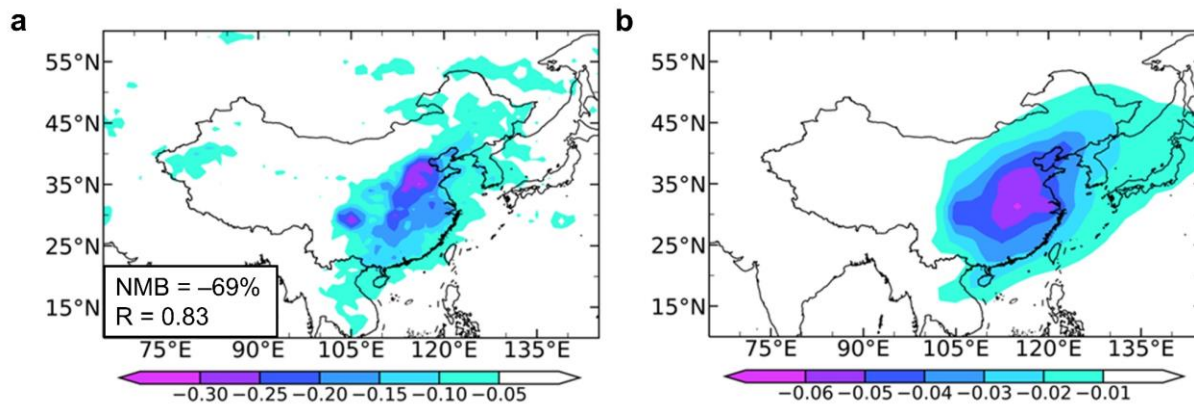

46

47 **Figure S3. Comparisons of temporal changes in aerosol optical depth (AOD) between**  
 48 **satellite retrieval and model simulation.** Spatial distributions of annual mean changes (2017–  
 49 2019 minus 2013–2015) in Moderate Resolution Imaging Spectroradiometer (MODIS) (a) and  
 50 modeled (b) AOD (unitless). Normalized mean bias (NMB) and correlation coefficient (R)  
 51 between modeled AOD and MODIS AOD are shown at the bottom-left corner of panel a.  $NMB$   
 52  $= 100 \% \times \sum (AOD-model_i - AOD-MODIS_i) / \sum AOD-MODIS_i$ , where  $AOD-model_i$  and  $AOD-$   
 53  $MODIS_i$  are the modeled and MODIS AOD values at grid  $i$ , respectively.

54

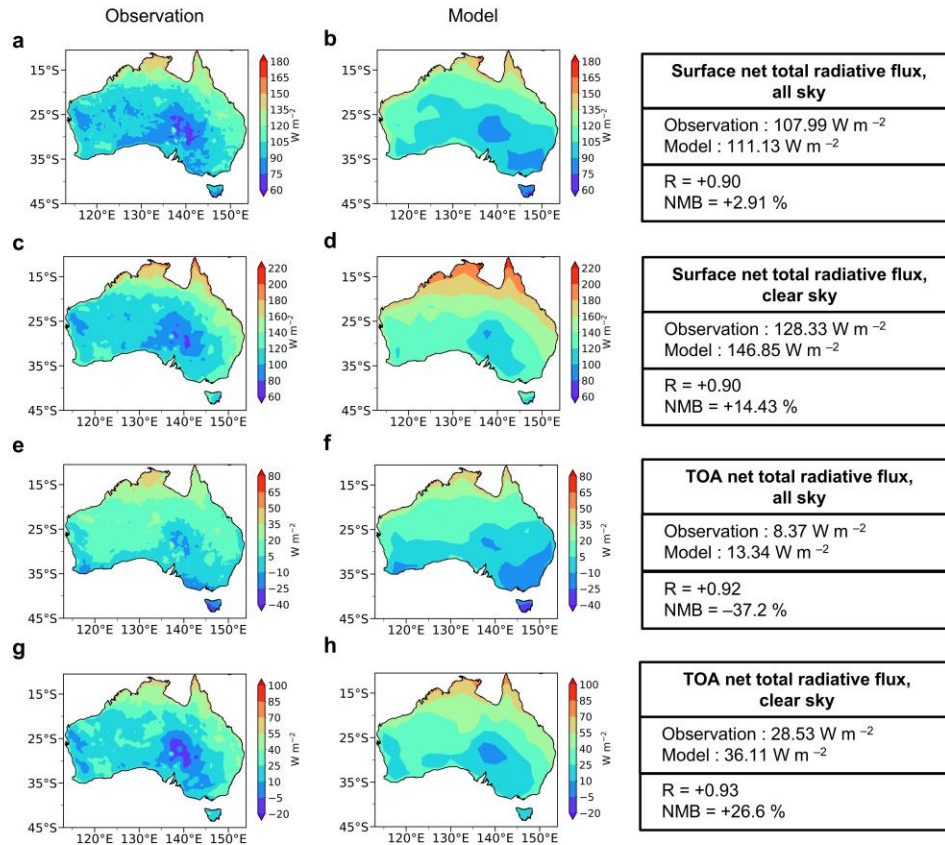

55

56 **Figure S4. Comparisons of surface and TOA net total radiative flux under all sky and clear**  
 57 **sky conditions between observation and model simulation.** Spatial distributions of surface (a–  
 58 **d)** and TOA (e–h) net total radiative flux (unit: W m<sup>-2</sup>) under all sky (a, b, e, and f) and clear sky  
 59 (c, d, g, and h) conditions over Australia in observation (2010–2019 annual averages from ERA5,  
 60 a, c, e, and g) and model simulation (annual averages from the BASE experiment, b, d, f, and h).  
 61 Regional averages over Australia in observation and model simulation and normalized mean bias  
 62 (NMB) and correlation coefficient (R) between observation and model simulation are shown in  
 63 the right boxes.

64

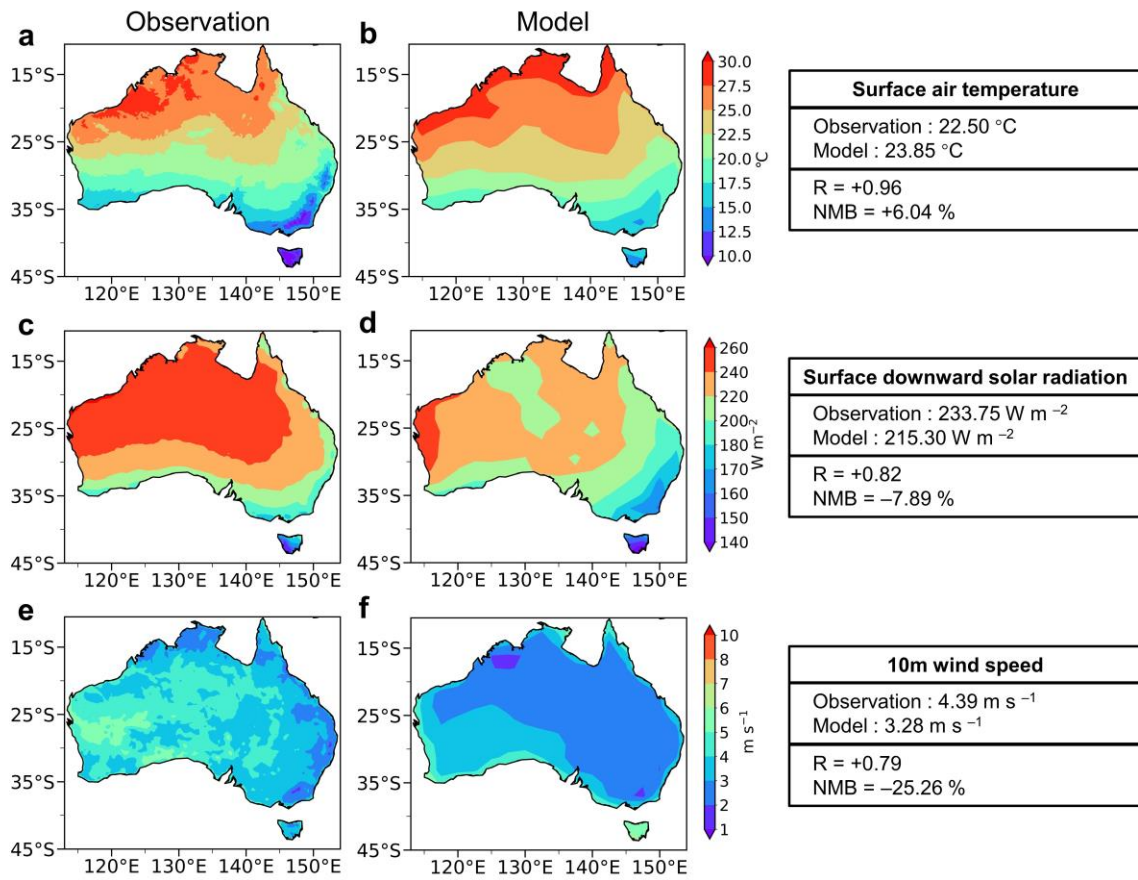

65

66 **Figure S5. Comparisons of surface air temperature, surface downward solar radiation, and**  
 67 **10m wind speed between observation and model simulation. Same as Figure S4, but for surface**  
 68 **air temperature (a and b, unit: °C), surface downward solar radiation (c and d, unit: W m<sup>-2</sup>) and**  
 69 **10m wind speed (e and f, unit: m s<sup>-1</sup>).**

70

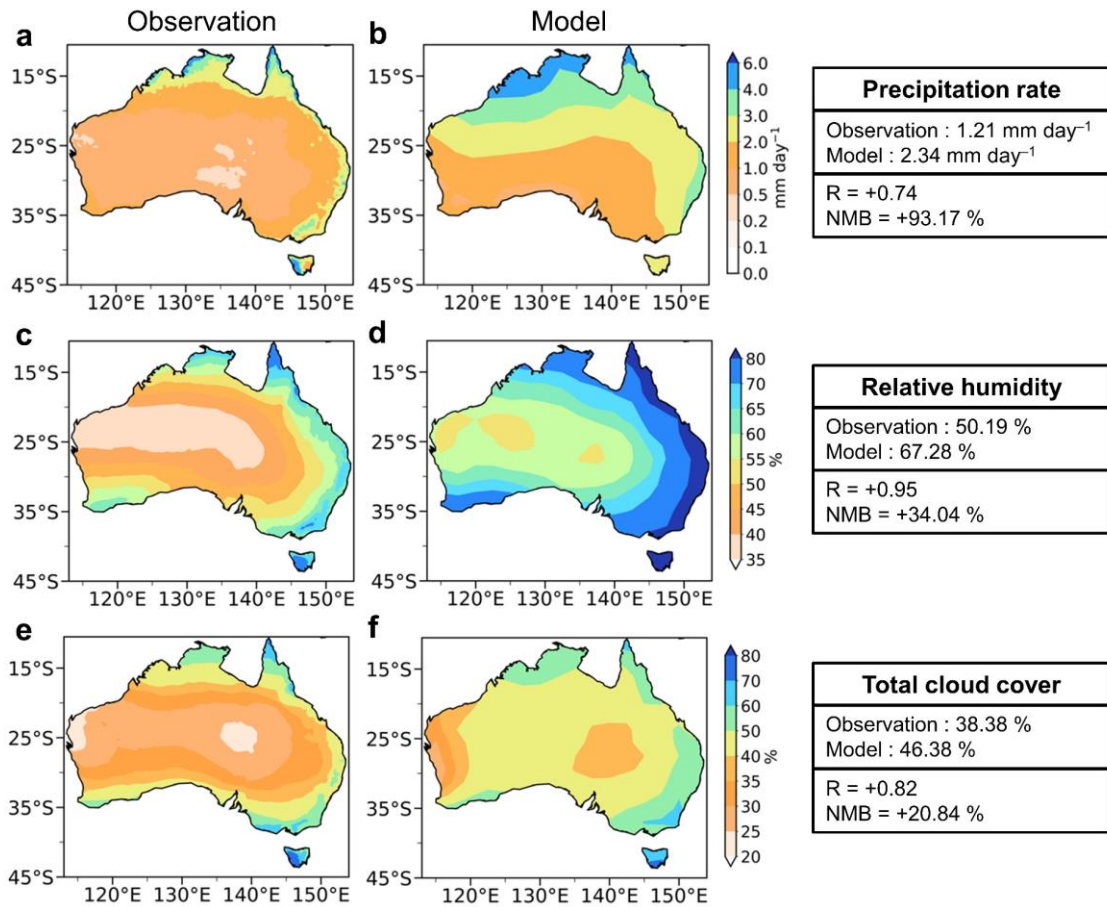

71

72 **Figure S6. Comparisons of precipitation rate, relative humidity and total cloud cover**  
 73 **between observation and model simulation. Same as Figure S4, but for precipitation rate (a and**  
 74 **b, unit: mm day<sup>-1</sup>), relative humidity (c and d, unit: %), and total cloud cover (e and f, unit: %).**

75



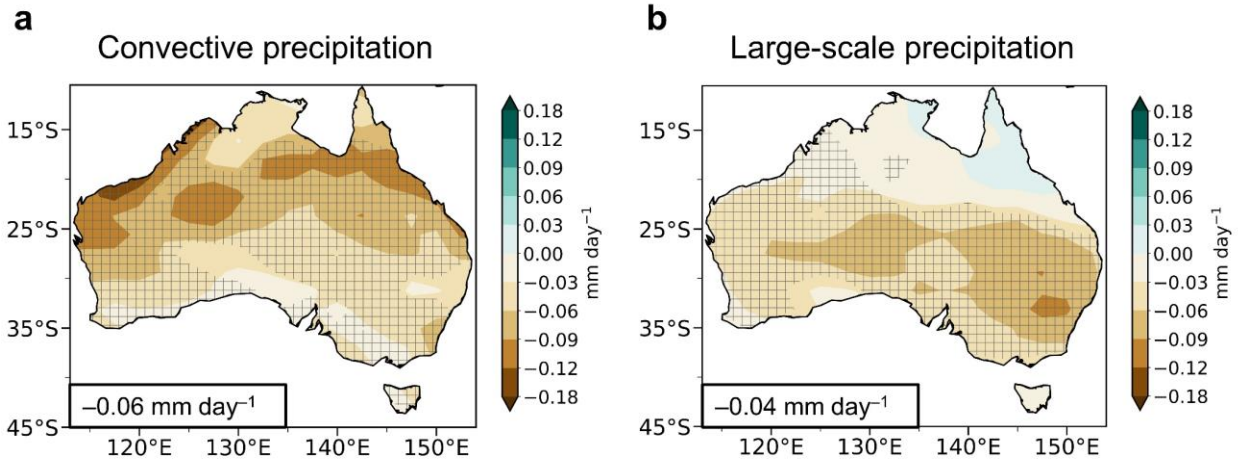

76

77 **Figure S7. Simulated changes in convective and large-scale precipitation rate in Australia**  
 78 **due to aerosol changes in China between 2013 and 2019.** Spatial distributions of simulated  
 79 differences in annual mean convective (a) and large-scale (b) precipitation rate (unit: mm day<sup>-1</sup>)  
 80 in Australia between BASE and CHN (CHN minus BASE). The shaded areas indicate results are  
 81 statistically significant at the 90% confidence level. Regional averages of the responses over  
 82 Australia are noted at the bottom-left corner of each panel.

83

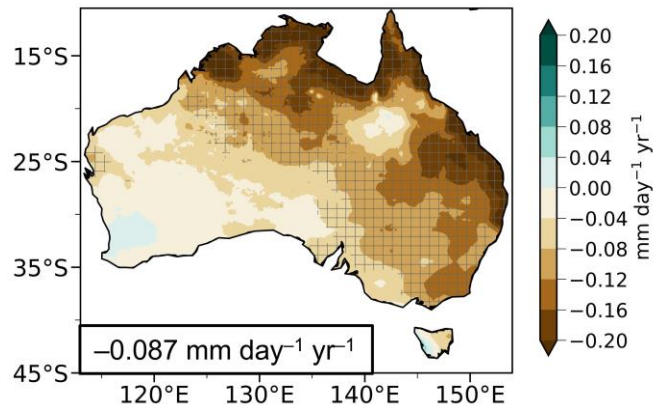

84

85 **Figure S8. Linear trends of observed precipitation rate in Australia based on GPM.** Spatial  
 86 distributions of linear trends of annual mean precipitation rate (unit: mm day<sup>-1</sup> yr<sup>-1</sup>) in Australia  
 87 during 2010–2019 from GPM. The shaded areas indicate trends are statistically significant at the  
 88 90% confidence level. Regional averages over Australia are noted at the bottom-left corner of the  
 89 panel.

90

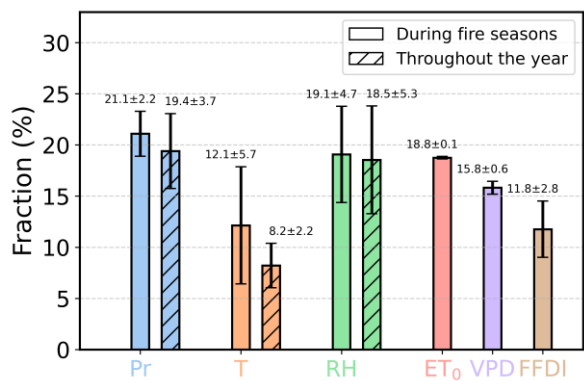

91

92 **Figure S9. Fractional contributions of the observed changes in climate variables and wildfire**  
 93 **risk indices attributable to aerosol changes in China.** Fractional contributions (unit: %) of the  
 94 observed changes in climate variables (precipitation rate [Pr], surface air temperature [T], and  
 95 relative humidity [RH]) during fire seasons and throughout the year and wildfire risk indices  
 96 (reference potential evapotranspiration [ET<sub>0</sub>], vapor pressure deficit [VPD], and McArthur forest  
 97 fire danger index [FFDI]) during fire seasons attributable to aerosol changes in China. Error bar  
 98 represents the standard deviation of 3-ensemble members.  
 99

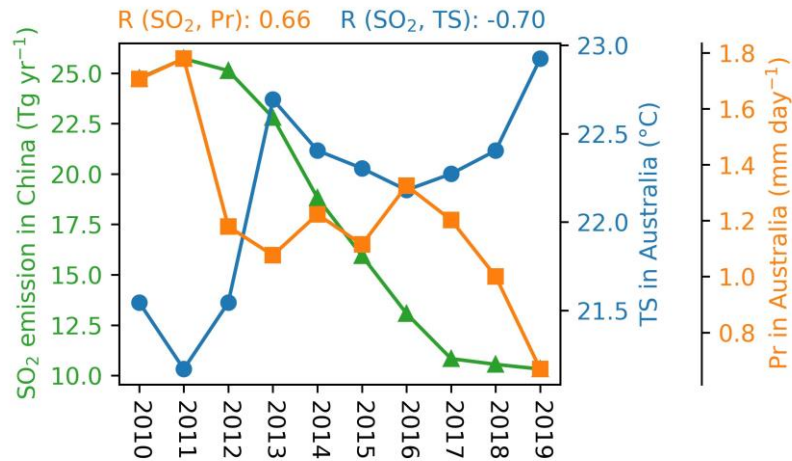

100

101 **Figure S10. Time series of anthropogenic SO<sub>2</sub> emission in China alongside surface air**  
 102 **temperature and precipitation rate averaged over Australia.** SO<sub>2</sub> emission (unit: Tg yr<sup>-1</sup>) data  
 103 are sourced from CEDS, while surface air temperature (unit: °C) and precipitation rate (unit: mm  
 104 day<sup>-1</sup>) data are derived from ERA5. Correlations between SO<sub>2</sub> emission in China and surface air  
 105 temperature averaged over Australia, as well as between SO<sub>2</sub> emission in China and precipitation  
 106 rate averaged over Australia, are indicated above the figure.

107

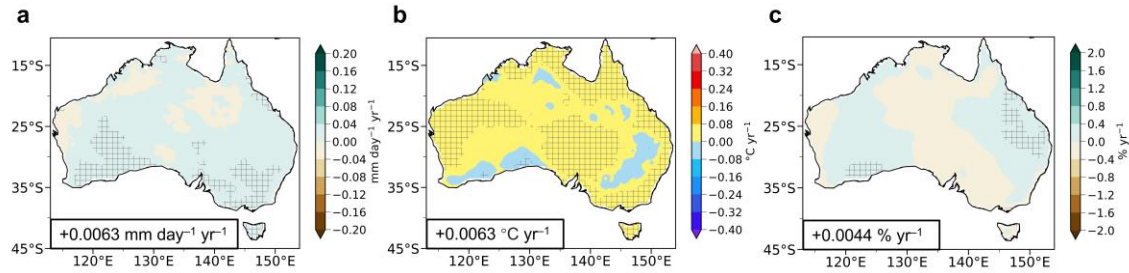

108

109 **Figure S11. Linear trends of observed precipitation rate, surface air temperature and**  
 110 **relative humidity in Australia during 1940–2019 based on ERA5.** Spatial distributions of linear  
 111 trends of annual mean precipitation rate (**a**, unit: mm day<sup>-1</sup> yr<sup>-1</sup>), surface air temperature (**b**,  
 112 unit: °C yr<sup>-1</sup>) and relative humidity (**c**, unit: % yr<sup>-1</sup>) in Australia during 1940–2019 from ERA5.  
 113 The shaded areas indicate trends are statistically significant at the 90% confidence level. Regional  
 114 averages over Australia are noted at the bottom-left corner of each panel.

115

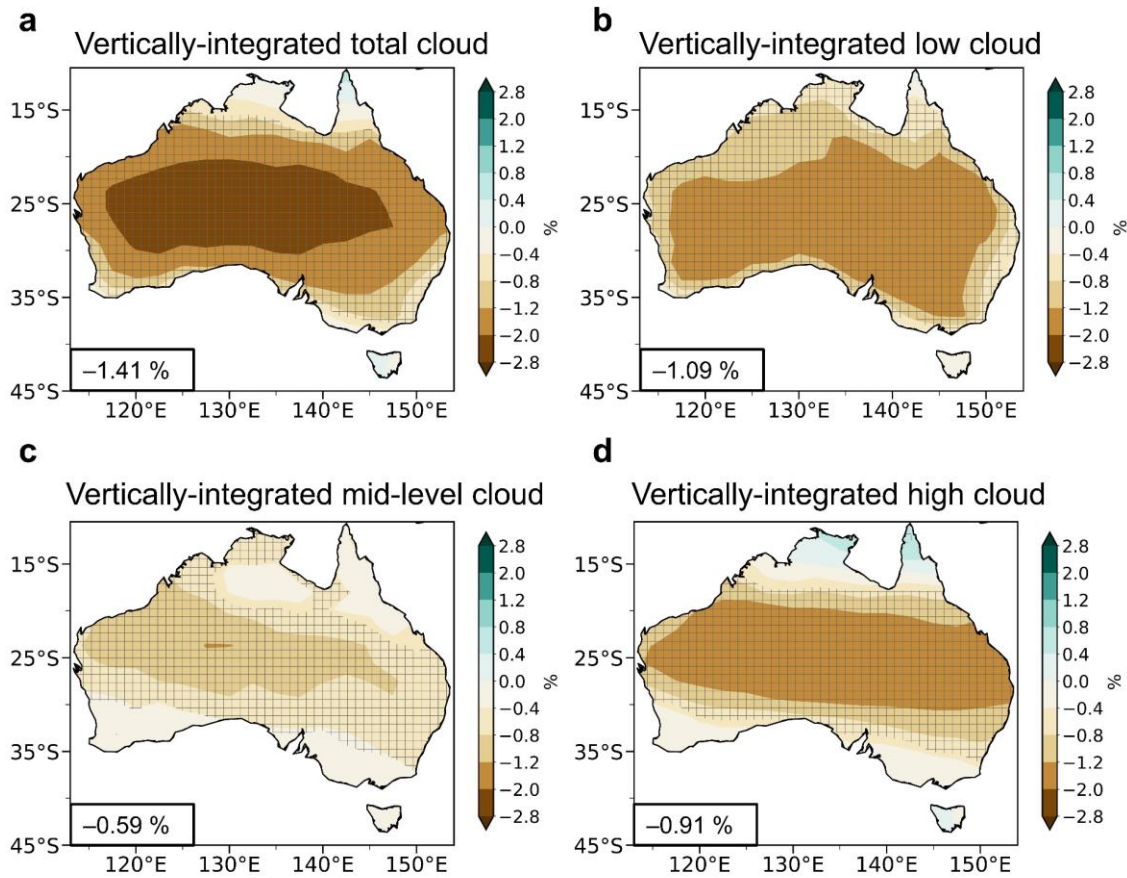

116

117 **Figure S12. Changes in vertically-integrated total, low, mid-level, and high cloud cover in**  
 118 **Australia due to aerosol changes in China between 2013 and 2019.** Spatial distributions of  
 119 simulated differences in annual mean vertically-integrated total (a), low (b), mid-level (c), and  
 120 high (d) cloud cover (unit: %) in Australia between BASE and CHN (CHN minus BASE). The  
 121 shaded areas indicate results are statistically significant at the 90% confidence level. Regional  
 122 averages of the responses over Australia are noted at the bottom-left corner of each panel.

123

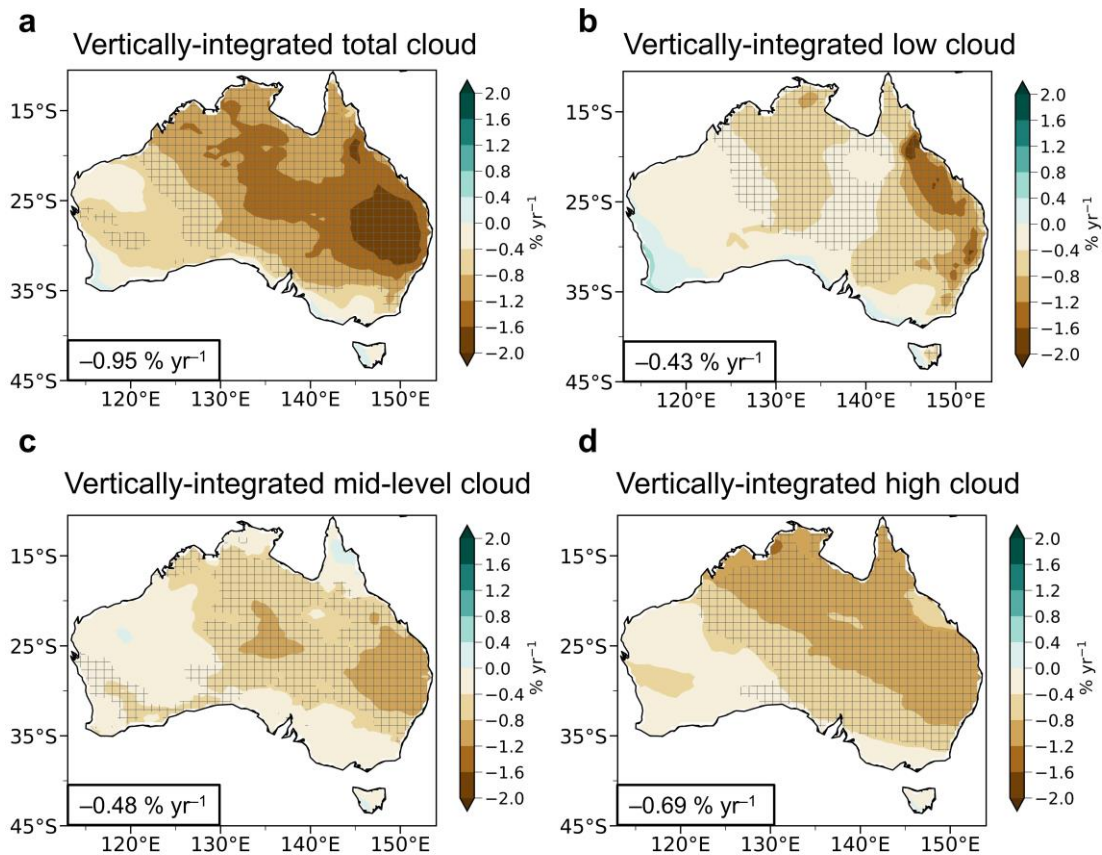

124

125 **Figure S13. Linear trends of observed vertically-integrated total, low, mid-level, and high**  
 126 **cloud cover in Australia based on ERA5.** Spatial distributions of linear trends in annual mean  
 127 vertically-integrated total (a), low (b), mid-level (c), and high (d) cloud cover (unit: % yr<sup>-1</sup>) in  
 128 Australia during 2010–2019 from ERA5. The shaded areas indicate trends are statistically  
 129 significant at the 90% confidence level. Regional averages over Australia are noted at the bottom-  
 130 left corner of each panel.

131

132

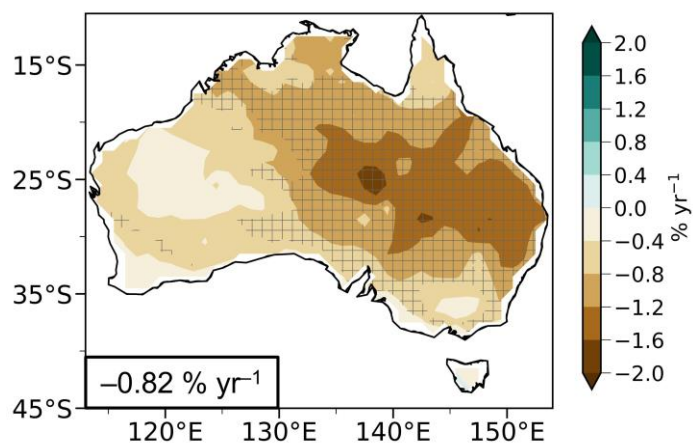

133

134 **Figure S14. Linear trends of observed total cloud cover in Australia based on CERES-EBAF.**

135 Spatial distributions of linear trends of annual mean vertically-integrated total cloud cover (unit: %  
 136 yr<sup>-1</sup>) in Australia during 2010–2019 from CERES-EBAF. The shaded areas indicate trends are  
 137 statistically significant at the 90% confidence level. Regional averages over Australia are noted at  
 138 the bottom-left corner of the figure.

139



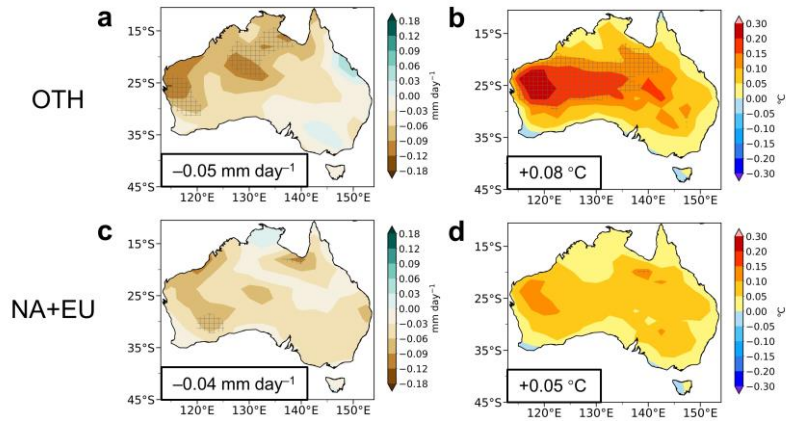

140

141 **Figure S15. Simulated changes in precipitation rate and surface air temperature in Australia**  
 142 **due to aerosol changes in different regions between 2013 and 2019.** Spatial distributions of  
 143 simulated differences in annual mean precipitation rate (**a** and **c**, unit:  $\text{mm day}^{-1}$ ) and surface air  
 144 temperature (**b** and **d**, unit:  $^{\circ}\text{C}$ ) in Australia between BASE and OTH (OTH minus BASE, **a** and  
 145 **b**), and between BASE and NAEU (NAEU minus BASE, **c** and **d**). The shaded areas indicate  
 146 results are statistically significant at the 90% confidence level. The regional averages over  
 147 Australia is noted at the bottom-left corner of each panel.

148

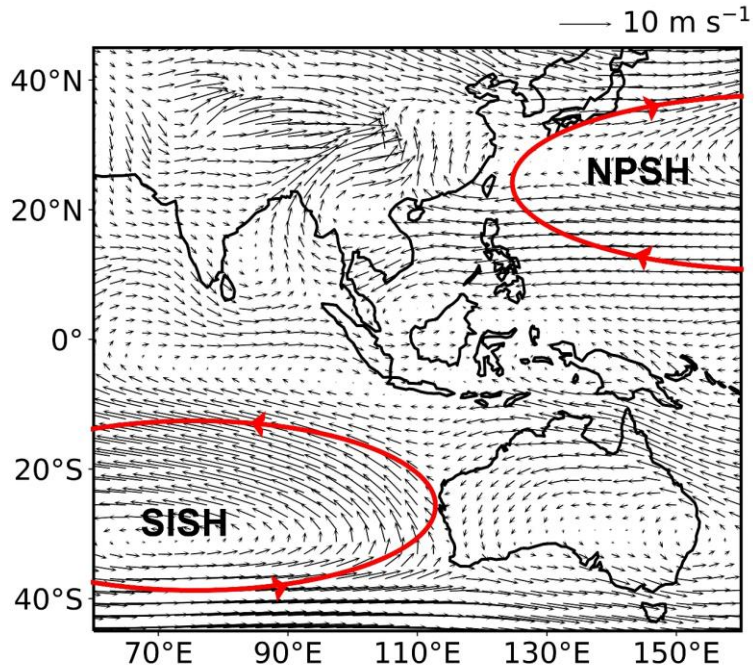

149

150 **Figure S16. Climatological mean wind fields at 850 hPa.** Climatological mean wind fields (unit:  
 151 m s<sup>-1</sup>, vectors) at 850 hPa from the BASE experiment. NPSH and SISH shown in red circles  
 152 represents North Pacific Subtropical High and Southern Indian ocean Subtropical High,  
 153 respectively.

154

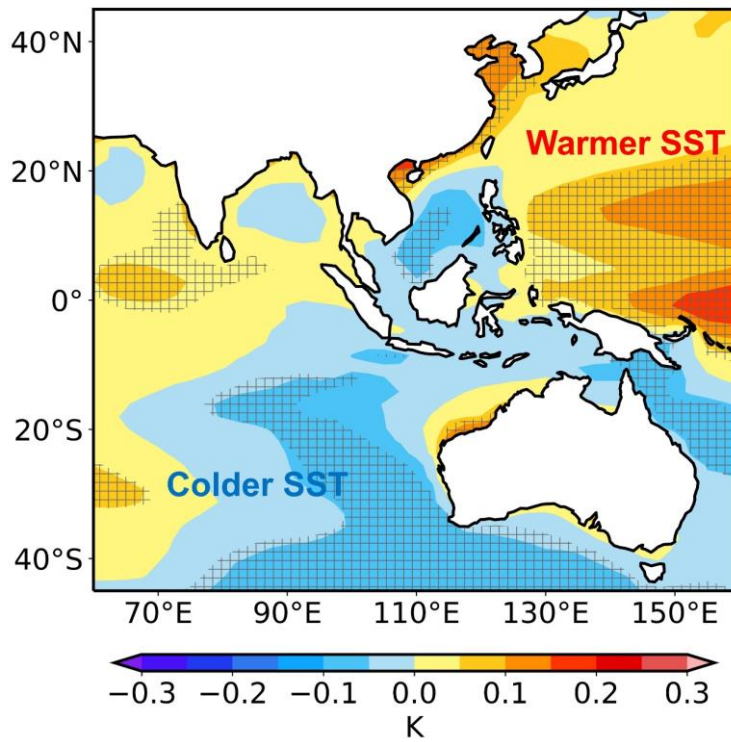

155

156 **Figure S17. Simulated sea surface temperature changes due to aerosol changes in China**  
 157 **between 2013 and 2019.** Spatial distributions of simulated differences in annual mean sea surface  
 158 temperature (SST, unit:  $\text{mm day}^{-1}$ ) in Australia between BASE and CHN (CHN minus BASE).  
 159 The shaded areas indicate results are statistically significant at the 90% confidence level.

160

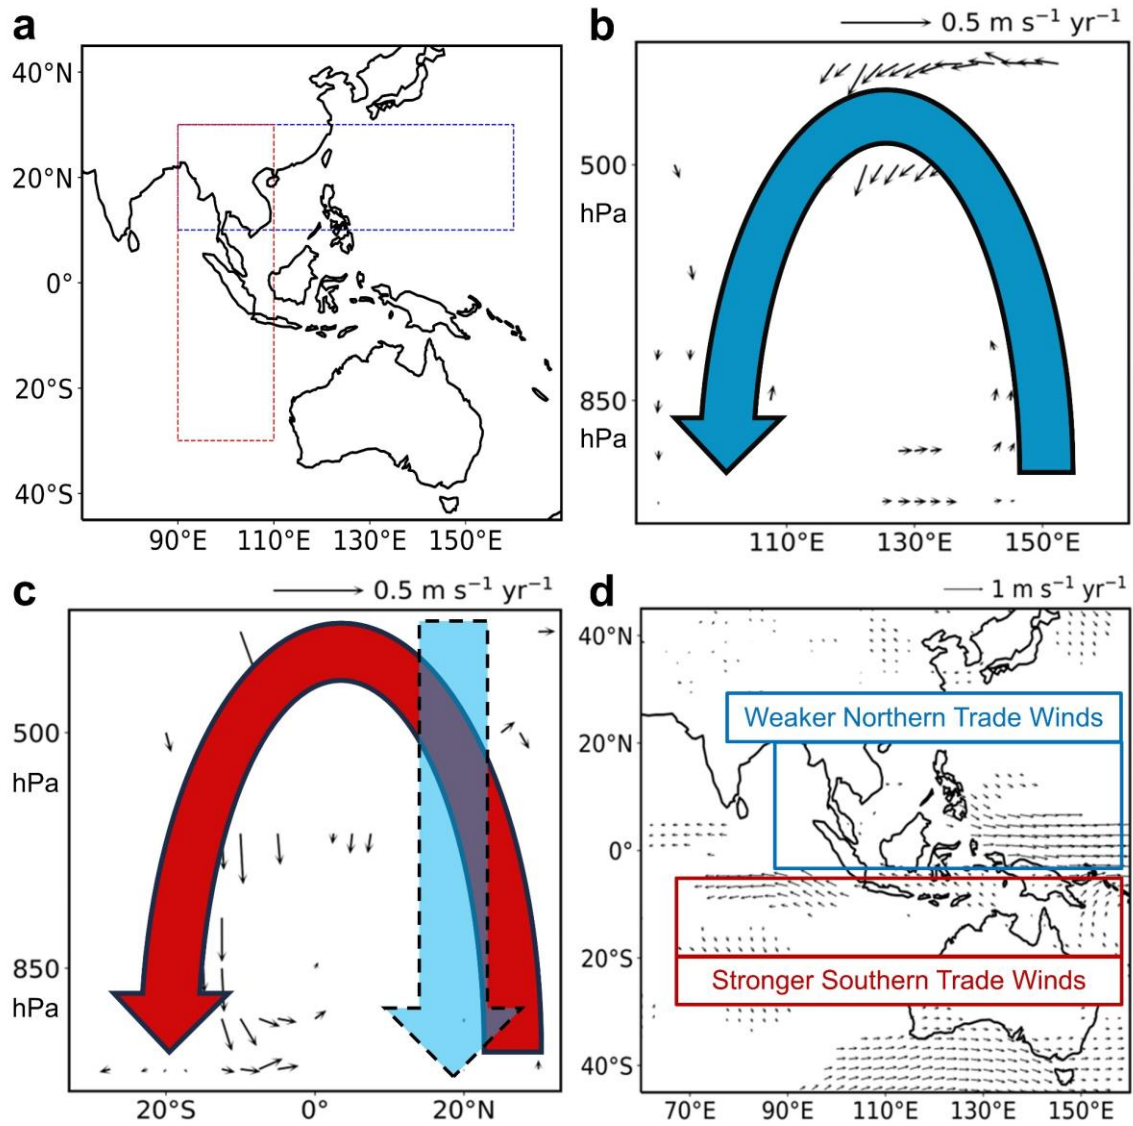

161

162 **Figure S18. Linear trends in observed vertical circulations and 850 hPa wind fields in Asia-**  
 163 **Pacific regions.** Panel **b** and **c** shows pressure–longitude and latitude cross-section of linear trends  
 164 in annual mean atmospheric circulations (unit:  $\text{m s}^{-1}$ , vectors) over areas marked with the blue and  
 165 red box in panel **a** during 2010–2019 from ERA5. Panel **d** shows linear trends of wind fields (unit:  
 166  $\text{m s}^{-1}$ , vectors) at 850 hPa in Asia-Pacific regions. Only trends of atmospheric circulations and  
 167 winds which are statistically significant at the 90% confidence level are shown.

168

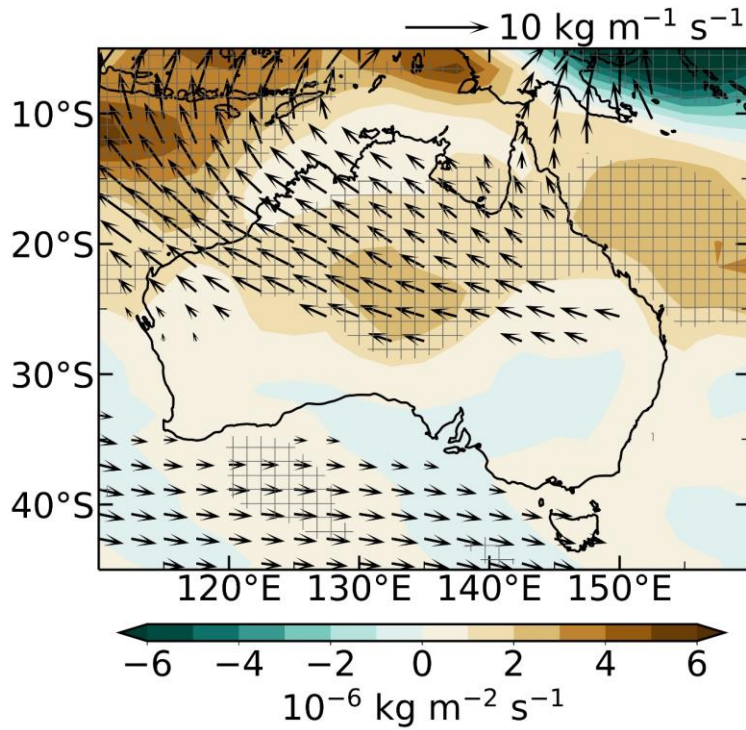

169

170 **Figure S19. Simulated changes in vertically-integrated moisture flux and its divergence in**  
 171 **Australia due to aerosol changes in China between 2013 and 2019.** Spatial distributions of  
 172 simulated differences in annual mean vertically integrated moisture flux (unit:  $\text{kg m}^{-1} \text{s}^{-1}$ , vectors)  
 173 and its divergence (unit:  $\text{kg m}^{-2} \text{s}^{-1}$ , shades) in Australia between BASE and CHN (CHN minus  
 174 BASE). Only moisture fluxes which are statistically significant at the 90% confidence level are  
 175 shown. The shaded areas indicate divergences are statistically significant at the 90% confidence  
 176 level.

177

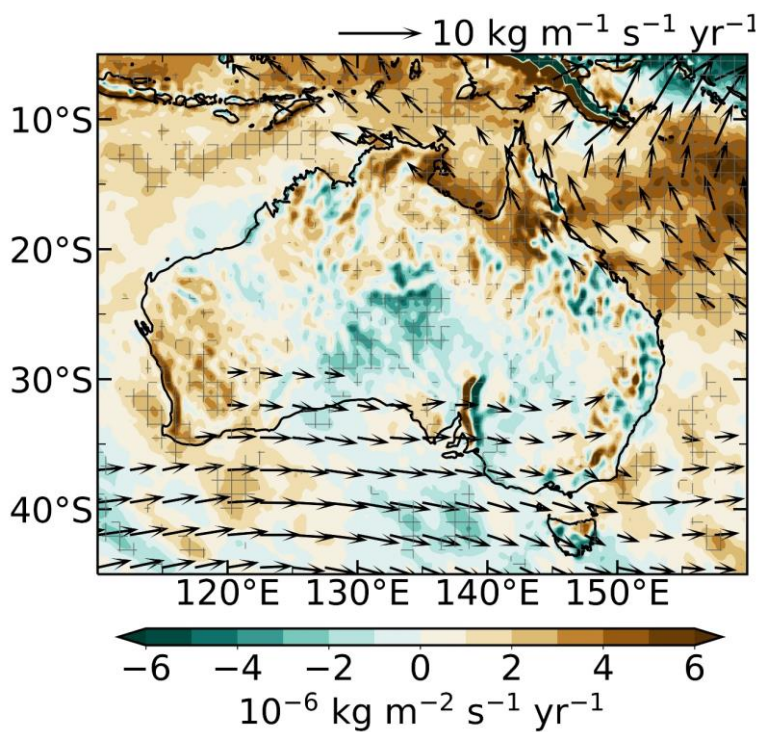

178

179 **Figure S20. Linear trends in vertically integrated moisture flux and its divergence in**  
 180 **Australia during 2010–2019.** Linear trends in annual mean vertically integrated moisture flux  
 181 (unit: kg m<sup>-1</sup> s<sup>-1</sup> yr<sup>-1</sup>, vectors) and its divergence (unit: kg m<sup>-2</sup> s<sup>-1</sup> yr<sup>-1</sup>, shades) in Australia during  
 182 2010–2019 from ERA5. Only trends of moisture fluxes which are statistically significant at the  
 183 90% confidence level are shown. The shaded areas indicate trends of the divergences are  
 184 statistically significant at the 90% confidence level.

185

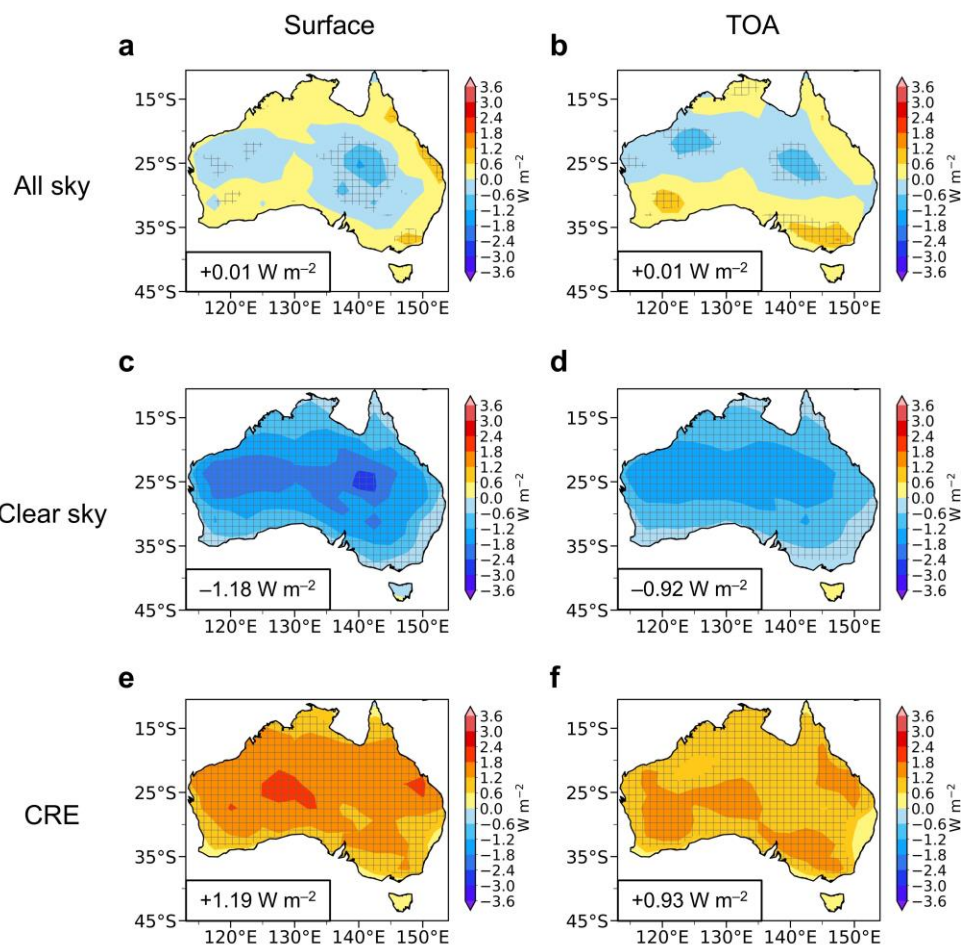

186  
 187 **Figure S21. Simulated changes in surface and Top of the Atmosphere (TOA) net total**  
 188 **radiative flux under all sky conditions, under clear sky conditions, and from cloud radiative**  
 189 **effects in Australia due to aerosol changes in China between 2013 and 2019.** Spatial  
 190 distributions of simulated differences in annual mean surface (a, c, and e) and Top of the  
 191 Atmosphere (TOA, b, d, and f) net total radiative flux (unit:  $W m^{-2}$ ) under all sky conditions (a  
 192 and b), under clear sky conditions (c and d), and from cloud radiative effects (CRE, e and f) in  
 193 Australia between BASE and CHN (CHN minus BASE). Cloud radiative effects refer to  
 194 differences under all sky and clear sky conditions (All sky minus Clear sky). The shaded areas  
 195 indicate results are statistically significant at the 90% confidence level. Regional averages of the  
 196 responses over Australia are noted at the bottom-left corner of each panel.  
 197

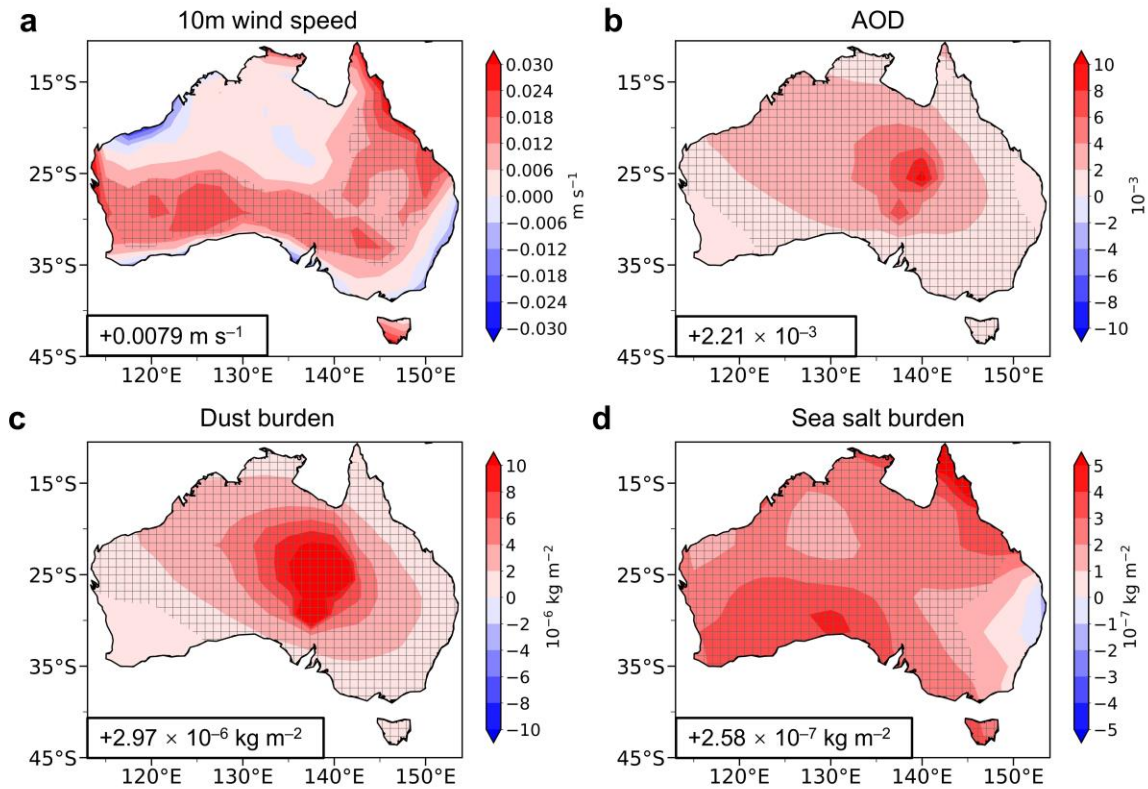

198

199 **Figure S22. Simulated changes in 10m wind speed, AOD, dust burden, and sea salt burden**  
 200 **in Australia due to aerosol changes in China between 2013 and 2019.** Spatial distributions of  
 201 simulated differences in annual mean 10m wind speed (**a**, unit:  $\text{m s}^{-1}$ ), AOD (**b**, unitless), dust  
 202 burden (**c**, unit:  $\text{kg m}^{-2}$ ), and sea salt burden (**d**, unit:  $\text{kg m}^{-2}$ ) in Australia between BASE and CHN  
 203 (CHN minus BASE). The shaded areas indicate results are statistically significant at the 90%  
 204 confidence level. Regional averages of the responses over Australia are noted at the bottom-left  
 205 corner of each panel.

206



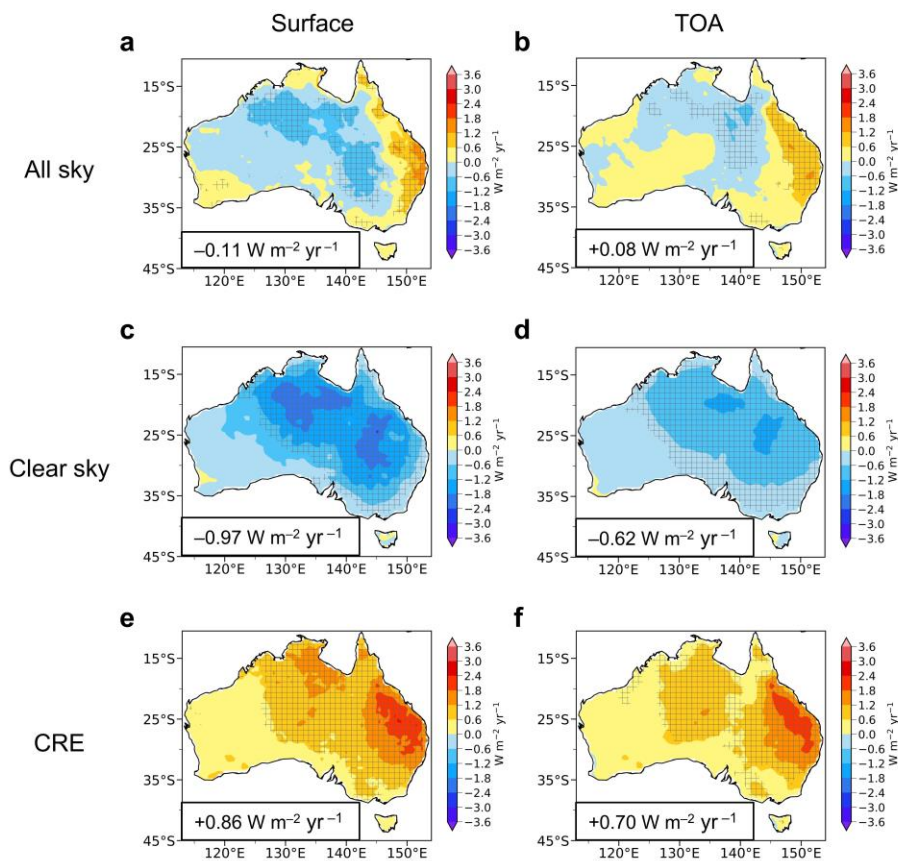

207

208 **Figure S23. Linear trends of observed surface and Top of the Atmosphere (TOA) net total**  
 209 **radiative flux under all sky conditions, under clear sky conditions, and from cloud radiative**  
 210 **effects in Australia based on ERA5. Spatial distributions of linear trends of annual mean surface**  
 211 **(a, c, and e) and Top of the Atmosphere (TOA, b, d, and f) net total radiative flux (unit:  $\text{W m}^{-2} \text{ yr}^{-1}$ )**  
 212 **under all sky conditions (a and b), under clear sky conditions (c and d), and from cloud radiative**  
 213 **effects (CRE, e and f) in Australia during 2010–2019 from ERA5. Cloud radiative effects refer to**  
 214 **differences under all sky and clear sky conditions (All sky minus Clear sky). The shaded areas**  
 215 **indicate trends are statistically significant at the 90% confidence level. Regional averages over**  
 216 **Australia are noted at the bottom-left corner of panels.**

217

218

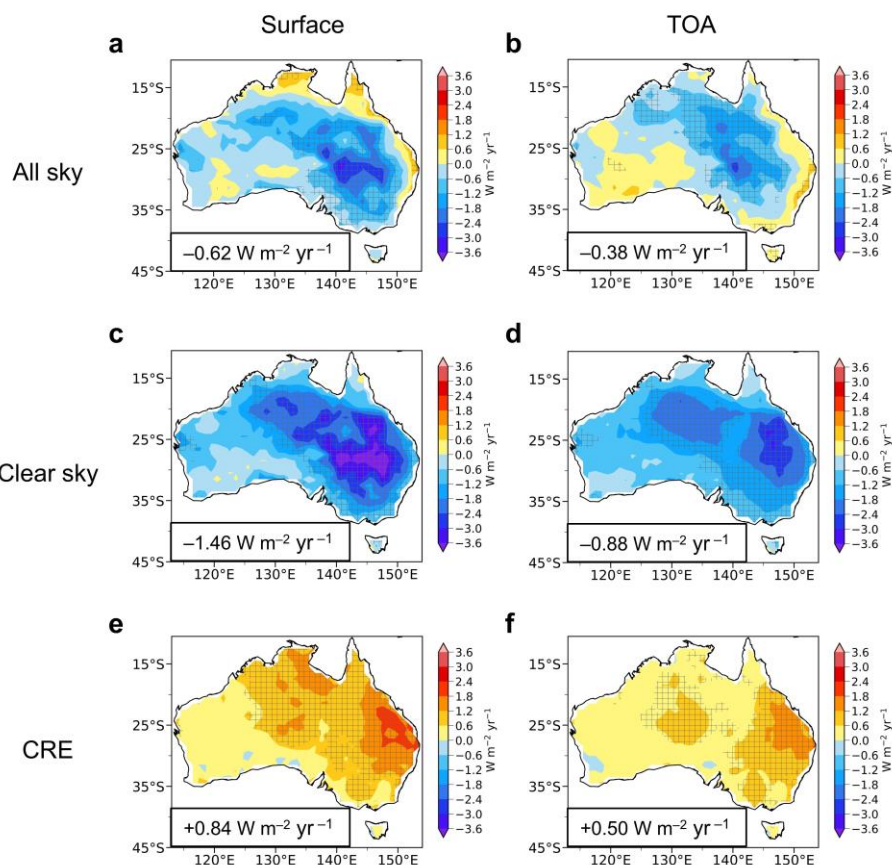

219  
 220 **Figure S24. Linear trends of observed surface and Top of the Atmosphere (TOA) net total**  
 221 **radiative flux under all sky conditions, under clear sky conditions, and from radiative**  
 222 **effects in Australia based on CERES-EBAF.** Spatial distributions of linear trends of annual  
 223 mean surface (a, c, and e) and Top of the Atmosphere (TOA, b, d, and f) net total radiative flux  
 224 (unit:  $\text{W m}^{-2} \text{yr}^{-1}$ ) under all sky conditions (a and b), under clear sky conditions (c and d), and  
 225 from cloud radiative effects (CRE, e and f) in Australia during 2010–2019 from CERES-EBAF.  
 226 Cloud radiative effects refer to differences under all sky and clear sky conditions (All sky minus  
 227 Clear sky). The shaded areas indicate trends are statistically significant at the 90% confidence level.  
 228 Regional averages over Australia are noted at the bottom-left corner of panels.  
 229

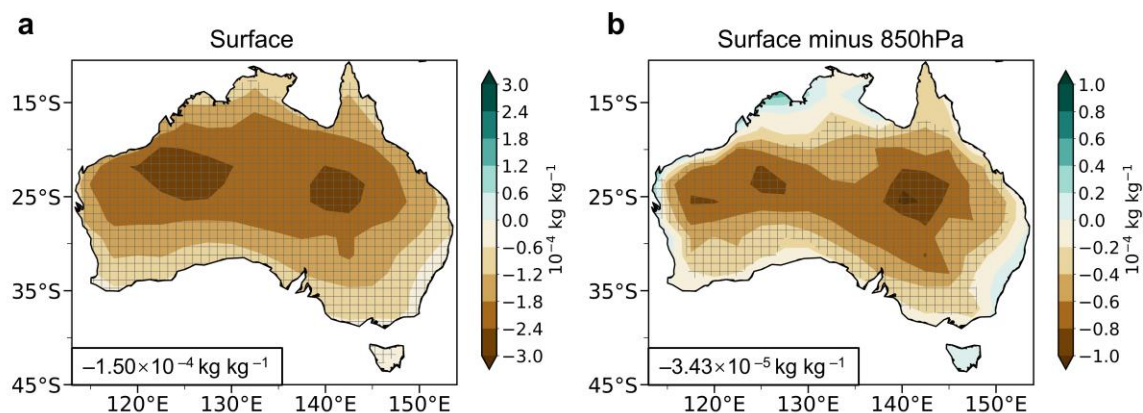

230

231 **Figure S25. Simulated changes in surface specific humidity and specific humidity differences**  
 232 **between surface and 850 hPa in Australia due to aerosol changes in China between 2013 and**  
 233 **2019.** Spatial distributions of simulated differences in annual mean surface specific humidity (**a**,  
 234 unit:  $\text{kg kg}^{-1}$ ) and differences in specific humidity between surface and 850 hPa (**b**, Surface minus  
 235 850 hPa, unit:  $\text{kg kg}^{-1}$ ) in Australia between BASE and CHN (CHN minus BASE). The shaded  
 236 areas indicate results are statistically significant at the 90% confidence level. Regional averages  
 237 over Australia are noted at the bottom-left corner of each panel.  
 238

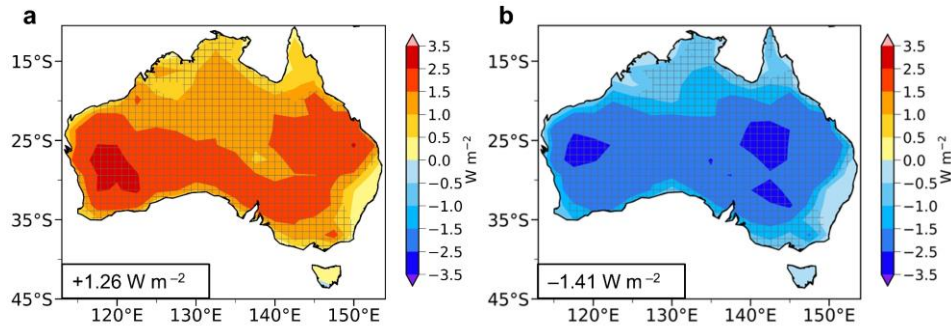

239

240 **Figure S26. Simulated changes in surface upward sensible and latent heat flux in Australia**  
 241 **due to aerosol changes in China between 2013 and 2019.** Spatial distributions of simulated  
 242 differences in annual mean surface upward sensible (a) and latent (b) heat flux (unit:  $\text{W m}^{-2}$ ) in  
 243 Australia between BASE and CHN (CHN minus BASE). The shaded areas indicate results are  
 244 statistically significant at the 90% confidence level. Regional averages over Australia are noted at  
 245 the bottom-left corner of each panel.

246

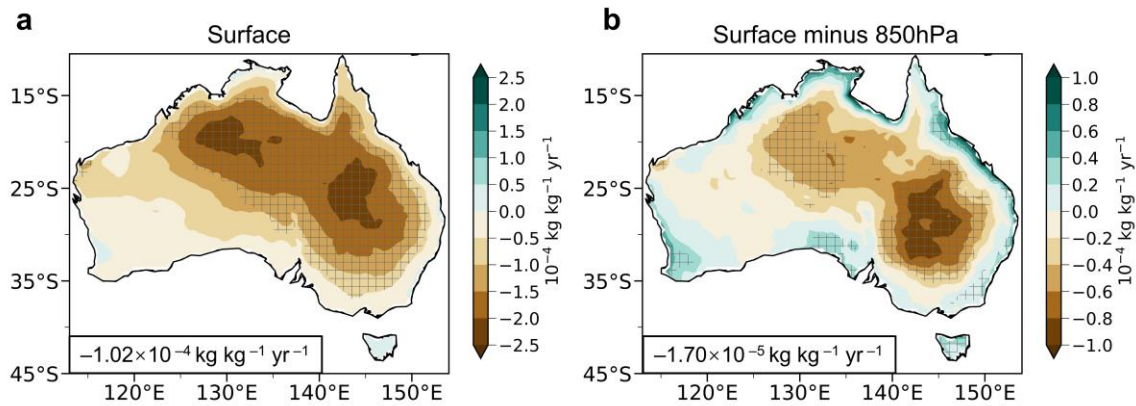

247

248 **Figure S27. Linear trends of observed surface specific humidity and specific humidity**  
 249 **differences between surface and near-surface air in Australia.** Spatial distributions of linear  
 250 trends of annual mean surface specific humidity (**a**, unit:  $\text{kg kg}^{-1} \text{yr}^{-1}$ ) and differences in specific  
 251 humidity between surface and near-surface air (**b**, Surface minus 850 hPa, unit:  $\text{kg kg}^{-1} \text{yr}^{-1}$ ) in  
 252 Australia during 2010–2019 from ERA5. The shaded areas indicate trends are statistically  
 253 significant at the 90% confidence level. Regional averages over Australia are noted at the bottom-  
 254 left corner of each panel.

255

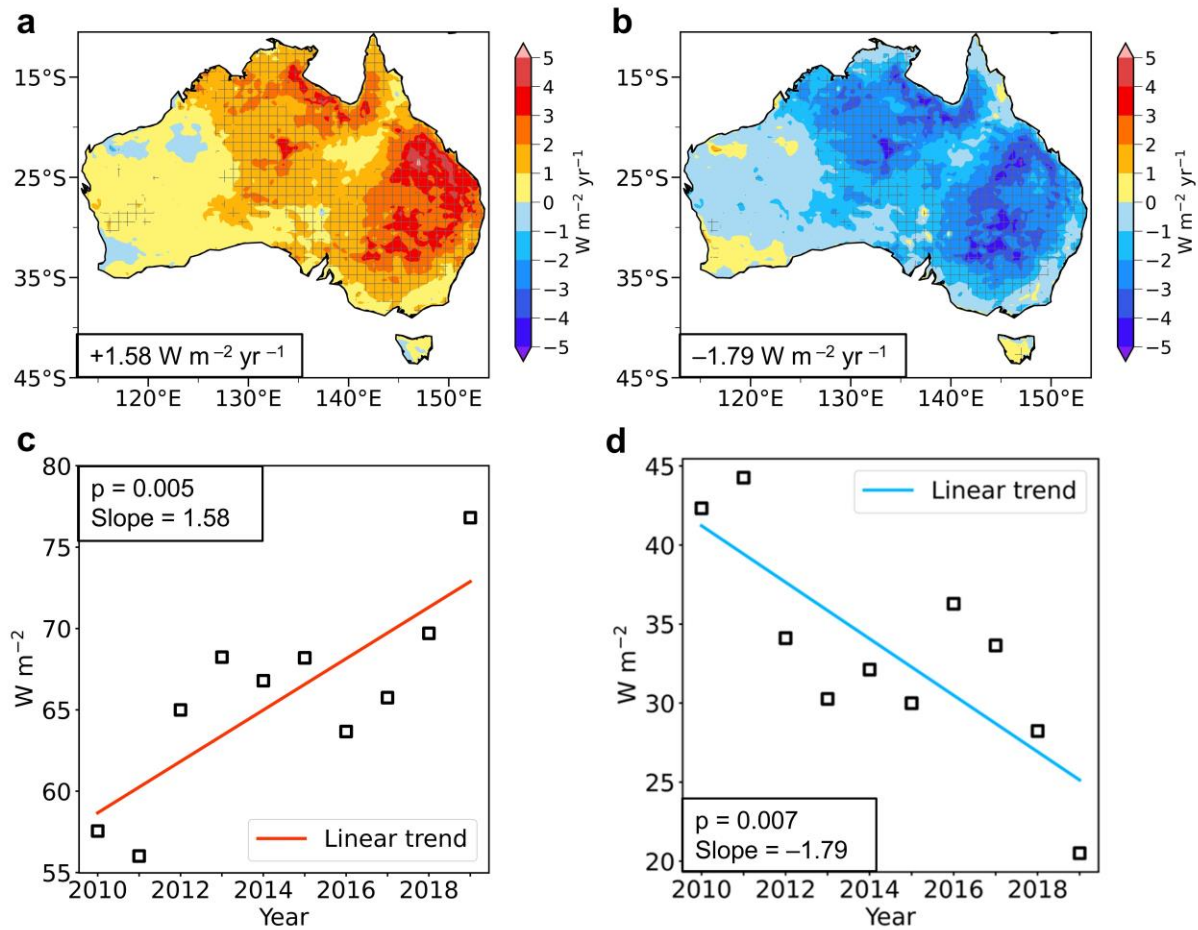

256

257 **Figure S28. Linear trends of observed surface sensible and latent heat flux in Australia**  
 258 **during 2010–2019.** Spatial distributions of linear trends (a and b) and time series (c and d) of  
 259 annual mean surface sensible (a and c) and latent (b and d) heat flux (unit:  $\text{W m}^{-2} \text{yr}^{-1}$ ) in Australia  
 260 during 2010–2019 from ERA5 reanalysis. The shaded areas indicate trends are statistically  
 261 significant at the 90% confidence level. Regional averages over Australia are noted at the bottom-  
 262 left corner of panels a and b. The p values and slopes of these linear trends are noted in panels c  
 263 and d.

264

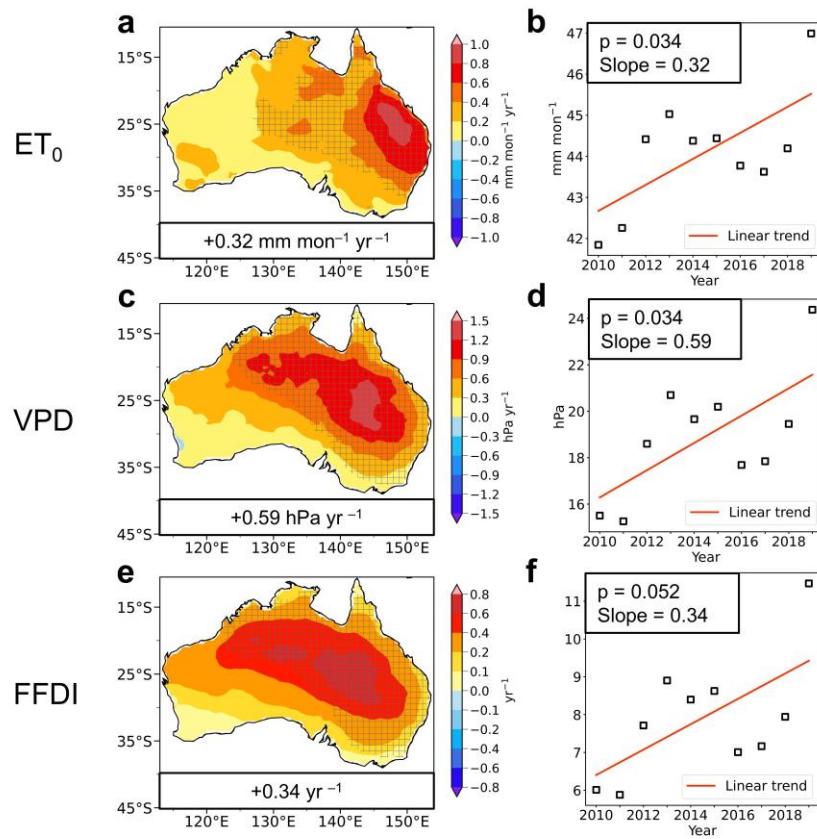

265

266 **Figure S29. Linear trends of reference potential evapotranspiration, vapor pressure deficit,**  
 267 **and McArthur forest fire danger index during fire seasons in Australia.** Spatial distributions  
 268 of linear trends (a, c, and e) and time series (b, d and f) of annual mean reference potential  
 269 evapotranspiration (ET<sub>0</sub>, a and b), vapor pressure deficit (VPD, c and d), and McArthur forest fire  
 270 danger index (FFDI, e and f) during fire seasons (austral spring and summer, from September to  
 271 the February of the next year) in Australia during 2010–2019 from ERA5. The shaded areas  
 272 indicate trends are statistically significant at the 90% confidence level. Regional averages over  
 273 Australia are noted at the bottom of panels a, c, and e. The p values and slopes of these linear  
 274 trends are noted in panels b, d, and f.
